# Supplementary material
Source: PubMed Central journal article supplement (PMC4326050)
Supplement: NIHMS415280-supplement-1_si_001.pdf [file NIHMS415280-supplement-1_si_001.pdf]

# Supporting Information

## Stress Response and Tolerance of *Zea mays* to CeO<sub>2</sub> Nanoparticles: Cross Talk among H<sub>2</sub>O<sub>2</sub>, Heat Shock Protein and Lipid Peroxidation

Lijuan Zhao,<sup>†,§</sup> Bo Peng,<sup>Δ</sup> Jose A. Hernandez-Viezcas,<sup>†,§</sup> Cyren Rico,<sup>†,§</sup> Youping Sun,<sup>⊥</sup>  
Jose R. Peralta-Videa,<sup>†,§</sup>, Xiaolei Tang,<sup>Δ</sup> Genhua Niu,<sup>⊥</sup> Lixin Jin,<sup>#</sup> Armando Varela-  
Ramirez,<sup>Δ</sup> Jian-ying Zhang,<sup>Δ</sup> Jorge L. Gardea-Torresdey<sup>†,¶\*,§</sup>

<sup>†</sup>Chemistry Department, The University of Texas at El Paso, 500 West Univ. Av., El Paso, TX 79968

<sup>¶</sup>Environmental Science and Engineering PhD program, The University of Texas at El Paso, 500 West Univ. Av., El Paso, TX 79968

<sup>Δ</sup> Department of Biological Sciences, Border Biomedical Research Center, The University of Texas at El Paso, 500 West Univ. Av., El Paso, TX 79968

<sup>#</sup>Department of Geology Sciences, The University of Texas at El Paso, 500 West Univ. Av., El Paso, TX 79968

<sup>⊥</sup> Texas AgriLife Research Center at El Paso, Texas A&M University System, El Paso, TX 79927

<sup>§</sup>UC Center for Environmental Implications of Nanotechnology (UC CEIN), The University of Texas at El Paso, USA

**CAT Assay:** Extractions were performed in a cold room at 4°C and a ratio of 10% w/v of sample was homogenized with phosphate buffer (25 mM KH<sub>2</sub>PO<sub>4</sub> at pH 7.4). The sample was centrifuged for 5 minutes at 2000 rpm on a bench centrifuge (Eppendorf AG bench centrifuge 5417 R, Hamburg, Germany). A sample of 50 µL of the supernatant and 950 µL of 10mM H<sub>2</sub>O<sub>2</sub> was placed in a quartz cuvette to obtain a final volume of 1 mL. The mixture was shaken by hand (three times) and the absorbance was measured for three minutes at 240 nm using a Perkin Elmer Lambda 14 UV/Vis spectrometer (single beam mode, Perkin Elmer, Uberlinger, Germany). The absorbance values were obtained from the first linear section of slope between 0.5 and 2 min. The extinction coefficient for H<sub>2</sub>O<sub>2</sub> was set at 23.148 mM<sup>-1</sup> cm<sup>-1</sup>.

**APX Assay:** Aliquots of 886 µL of 0.1 M KH<sub>2</sub>PO<sub>4</sub> buffered at pH 7.4, 10 µL of 17 mM H<sub>2</sub>O<sub>2</sub>, 100 µL of the sample, and 4 µL of a 25 mM solution of ascorbate were placed in a quartz cuvette for a total volume of 1 mL. The change in absorbance was recorded for two minutes at 265 nm in a Perkin Elmer Lambda 14 UV/Vis spectrometer. The absorbance was recorded as described above and the extinction coefficient was experimentally set at 22.21 mM<sup>-1</sup> cm<sup>-1</sup>.

**QB buffer preparation:** A volume of 100 mL of the buffer solution was obtained by adding 5 ml of 2 M KPO<sub>4</sub> (pH 7.8), 200 µl of 0.5 M EDTA, 1 ml of Triton X-100, 12.5 ml of 80% Glycerol, and 81.1 ml of H<sub>2</sub>O. Immediately before using, we added 100 µl of 1.0 M of DTT. The QB buffer was stored at -20°C.

**Microscopy Observations:** 20 day-old corn plants grown in soil were gently removed from the soil and thoroughly washed with deionized water. Subsequently, the plants were treated for 24 h with a suspension of CeO<sub>2</sub> NPs at 800 mg/L, harvested and prepared for microscopy observation. The samples were examined and photographed in a Zeiss EM-10 TEM, ACCF (Peabody, MA) at an accelerating voltage of 60 or 80 kV.

Root samples of 1 cubic mm were fixed in 2.0% (wt/vol) paraformaldehyde and 2.5% (v/v) glutaraldehyde in 0.06 M HEPES buffer, pH 7.4, for one h at room temperature, under continuous shaking. Sample specimens were washed three times for 15 min each with cold 0.06 M HEPES buffer and then post-fixed with 1% (wt/v) osmium tetroxide, 0.05 M potassium ferrocyanide in 0.12 M HEPES buffer for one h in the cold (-4° C). Specimens were then washed in 0.06 M HEPES buffer followed by three washings (15 min each) with distilled water and then *en bloc* stained in the refrigerator with 0.5% (wt/v) aqueous uranyl acetate for one h. Specimens were then dehydrated with ethanol at increments of 10% (starting with 30% ethanol) followed by 100% acetone. Specimens were infiltrated with, and embedded in, Poly Bed 812 (Polysciences, Warrington, PA). The cross sections (100 nm thick), above the root tips, were cut for TEM examination using a microtome with a diamond knife.

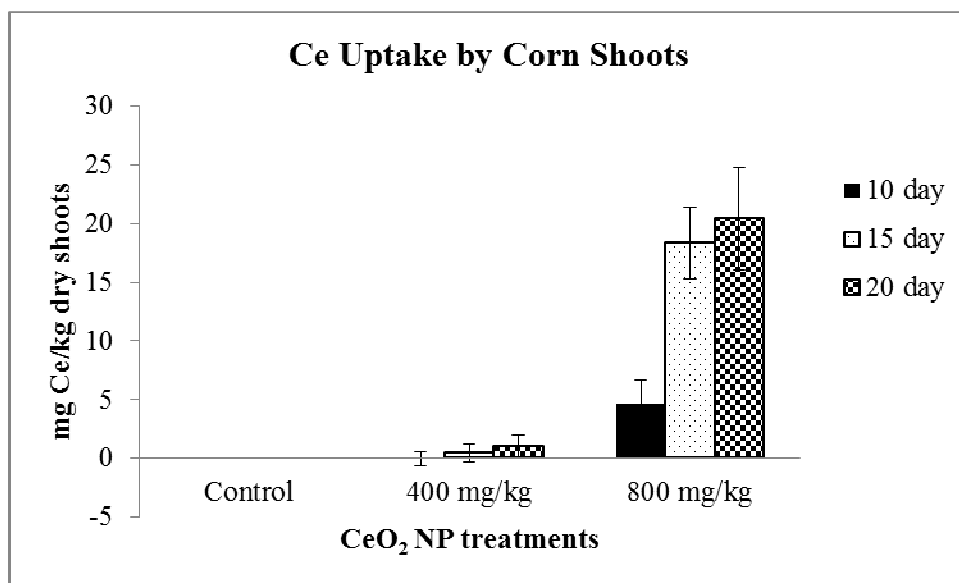

**Figure S1.** This figure shows the concentration of cerium in the shoots of soil grown corn plants, at different growth stages, exposed to CeO<sub>2</sub> NPs at 400 and 800 mg/kg.

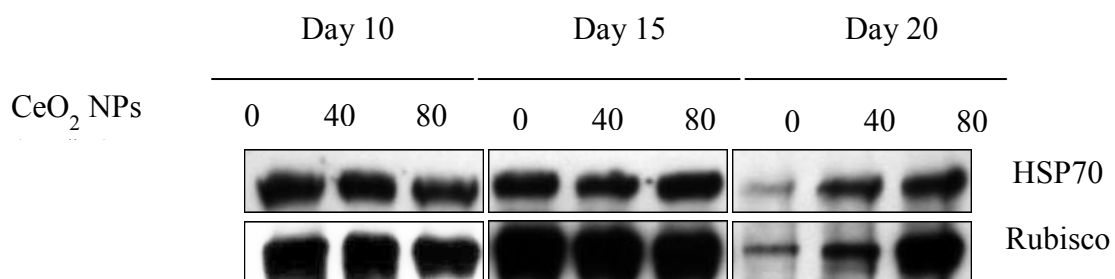

**Figure S2.** Western-blot analysis of HSP70 expression level in corn leaves. Leave proteins were extracted and acetone precipitated. Equal amount of proteins (20  $\mu$ g) were loaded to each lane and resolved by SDS-PAGE. After being transferred to nitrocellulose membrane, HSP70 was detected with rabbit anti-cytoplasmic HSP70. Expression level of HSP70 was normalized to the expression level of Rubisco (internal control).

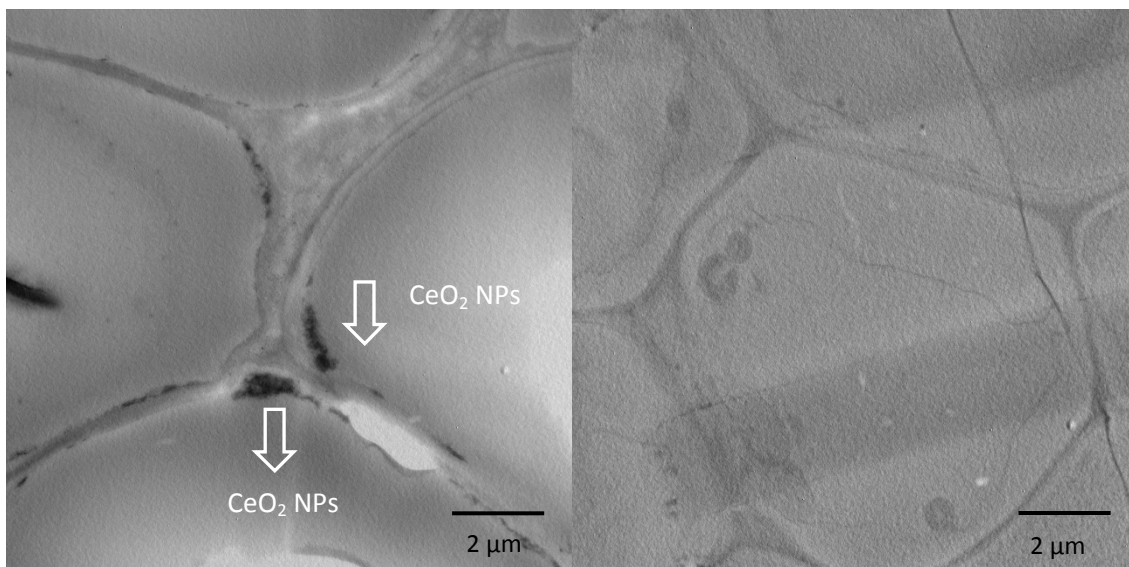

**Figure S3.** TEM images showing (A) CeO<sub>2</sub> NPs deposited on the internal part of the cell wall. (B) Control.

Previous X-ray microfluorescence studies (*J. Hazard. Mater.* **2012**, 225, 131-138) have shown that CeO<sub>2</sub> NPs are stored without biotransformation within corn roots. Also, Ma et al. (*Chemosphere* **2010**, 78, 273-279) did not mention dissolution of CeO<sub>2</sub> NPs.
